# Supplementary figures and images for: Flow cytometry analysis reveals a decrease in intracellular sodium during sperm capacitation
Source: Oxford University Press journal article supplement (doi:10.1242/jcs.093344), 2012-01-15

**A.**

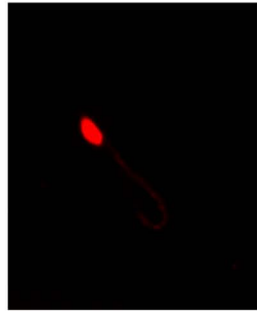

CoroNa Red

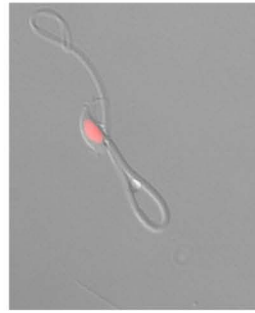

DIC/CoroNa Red

**B.**

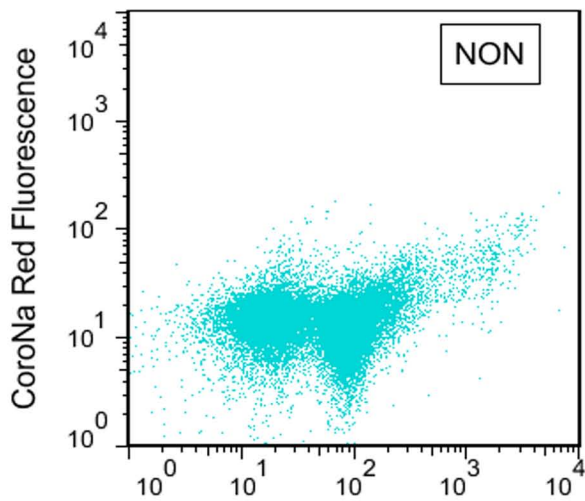

PI Fluorescence

**C.**

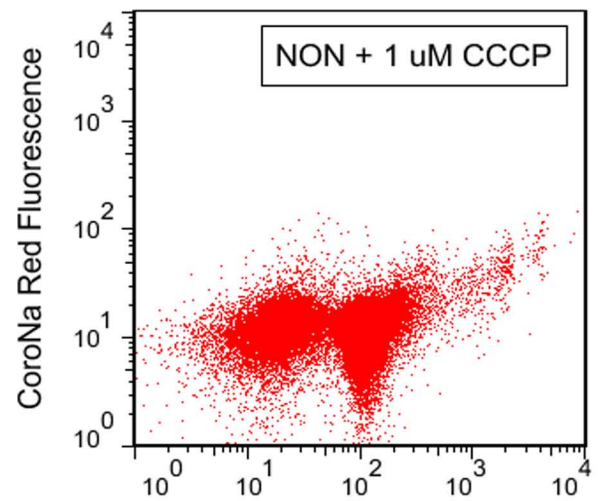

PI Fluorescence

**D.**

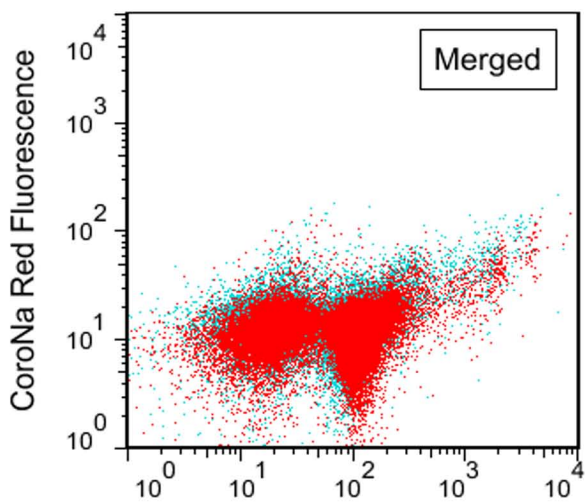

PI Fluorescence

**E.**

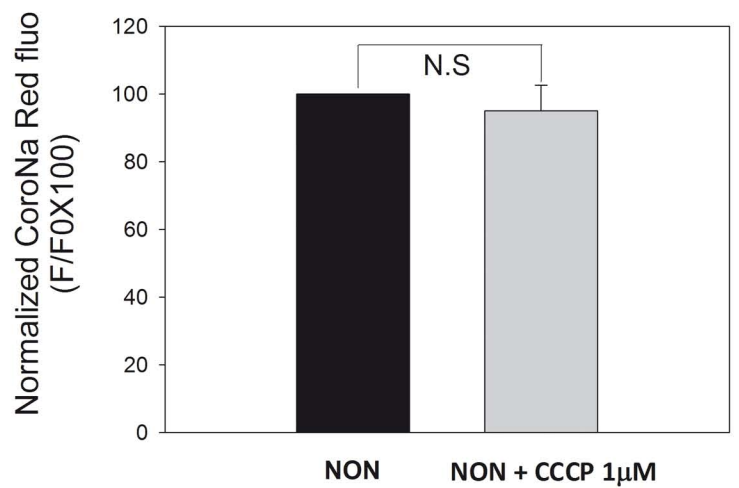

Supplement: jcs093344figs1.pdf [file jcs093344figs1.pdf]
